# Supplementary material for: Impact of Race and Ethnicity on Glaucoma Progression Detection by Perimetry and Optical Coherence Tomography
Source: PubMed Central journal article supplement (PMC11601835; doi:10.21203/rs.3.rs-5040415/v1), 2024-11-13
Supplement: NIHPPRS5040415V1-supplement-1.pdf [file NIHPPRS5040415V1-supplement-1.pdf]

**Table S1.** Baseline demographic and clinical characteristics of eyes and subjects included in the standard automated perimetry sample.

| Characteristic                                   | RACE                                      |                                           | ETHNICITY                                 |                                           | TOTAL                                     |
|--------------------------------------------------|-------------------------------------------|-------------------------------------------|-------------------------------------------|-------------------------------------------|-------------------------------------------|
|                                                  | Black or African American                 | White                                     | Hispanic or Latino                        | Not Hispanic or Latino                    |                                           |
| <b>SUBJECT-SPECIFIC</b>                          |                                           |                                           |                                           |                                           |                                           |
| Patients, n (%)                                  | 793 (21.8%)                               | 2,850 (78.2%)                             | 1,182 (32.4%)                             | 2,461 (67.6%)                             | 3,643 (100.0%)                            |
| Age (years), mean $\pm$ SD                       | 59.0 $\pm$ 12.3                           | 66.6 $\pm$ 11.5                           | 62.7 $\pm$ 11.8                           | 66.1 $\pm$ 12.0                           | 65.0 $\pm$ 12.1                           |
| Sex, n (%)<br>Female                             | 485 (61.2%)                               | 1,700 (59.6%)                             | 780 (66.0%)                               | 1,405 (57.1%)                             | 2,185 (60.0%)                             |
| <b>EYE-SPECIFIC</b>                              |                                           |                                           |                                           |                                           |                                           |
| Eyes, n (%)                                      | 1,171 (21.7%)                             | 4,231 (78.3%)                             | 1,778 (32.9%)                             | 3,624 (67.1%)                             | 5,402 (100.0%)                            |
| CCT ( $\mu$ m), mean $\pm$ SD<br>median (IQR)    | 523.9 $\pm$ 37.5<br>524.0 (497.0; 549.0)  | 543.0 $\pm$ 39.6<br>541.0 (517.0; 567.7)  | 539.6 $\pm$ 37.3<br>539.0 (515.0; 564.2)  | 537.7 $\pm$ 41.4<br>536.0 (510.0; 564.5)  | 538.4 $\pm$ 39.9<br>537.0 (511.0; 564.5)  |
| Visits (n), mean $\pm$ SD (range)                | 14.1 $\pm$ 12.1<br>(1.0; 111.0)           | 14.0 $\pm$ 13.0<br>(1.0; 122.0)           | 14.7 $\pm$ 13.0<br>(1.0; 110.0)           | 13.7 $\pm$ 12.7<br>(1.0; 122.0)           | 14.0 $\pm$ 12.8<br>(1.0; 122.0)           |
| Mean IOP (mmHg), mean $\pm$ SD<br>median (IQR)   | 15.1 $\pm$ 3.2<br>14.9 (13.0; 17.0)       | 14.5 $\pm$ 3.2<br>14.3 (12.4; 16.3)       | 15.0 $\pm$ 3.0<br>14.8 (13.0; 16.7)       | 14.5 $\pm$ 3.3<br>14.2 (12.3; 16.4)       | 14.6 $\pm$ 3.2<br>14.4 (12.6; 16.5)       |
| Peak IOP (mmHg), mean $\pm$ SD<br>median (IQR)   | 19.6 $\pm$ 5.4<br>19.0 (16.0; 22.0)       | 18.6 $\pm$ 5.8<br>18.0 (15.0; 21.0)       | 19.3 $\pm$ 5.5<br>18.7 (16.0; 22.0)       | 18.6 $\pm$ 5.9<br>18.0 (15.0; 21.0)       | 18.8 $\pm$ 5.7<br>18.0 (15.0; 21.5)       |
| <b>Standard Automated Perimetry</b>              |                                           |                                           |                                           |                                           |                                           |
| Follow-up (years), mean $\pm$ SD                 | 10.2 $\pm$ 4.9                            | 9.4 $\pm$ 4.5                             | 9.9 $\pm$ 4.9                             | 9.4 $\pm$ 4.4                             | 9.6 $\pm$ 4.6                             |
| Tests (n), mean $\pm$ SD (range)                 | 8.7 $\pm$ 4.3<br>(5.0; 31.0)              | 8.7 $\pm$ 4.0<br>(5.0; 37.0)              | 8.7 $\pm$ 4.1<br>(5.0; 37.0)              | 8.7 $\pm$ 4.1<br>(5.0; 34.0)              | 8.7 $\pm$ 4.1<br>(5.0; 37.0)              |
| Baseline MD (dB), mean $\pm$ SD<br>median (IQR)  | -7.30 $\pm$ 6.57<br>-4.92 (-10.01; -2.81) | -6.14 $\pm$ 5.88<br>-4.15 (-8.00; -2.17)  | -6.51 $\pm$ 6.30<br>-4.36 (-8.34; -2.30)  | -6.34 $\pm$ 5.93<br>-4.26 (-8.36; -2.34)  | -6.40 $\pm$ 6.06<br>-4.29 (-8.35; -2.31)  |
| Baseline PSD (dB), mean $\pm$ SD<br>median (IQR) | 5.58 $\pm$ 3.53<br>4.17 (2.61; 8.06)      | 5.39 $\pm$ 3.67<br>3.71 (2.41; 7.80)      | 5.31 $\pm$ 3.57<br>3.71 (2.47; 7.51)      | 5.49 $\pm$ 3.68<br>3.85 (2.45; 7.98)      | 5.43 $\pm$ 3.64<br>3.80 (2.46; 7.84)      |
| Baseline VFI (dB), mean $\pm$ SD<br>median (IQR) | 82.56 $\pm$ 20.13<br>92.00 (76.00; 96.00) | 85.14 $\pm$ 17.88<br>93.00 (81.00; 96.00) | 84.52 $\pm$ 19.11<br>93.00 (82.00; 96.00) | 84.61 $\pm$ 18.07<br>93.00 (80.00; 96.00) | 84.58 $\pm$ 18.42<br>93.00 (81.00; 96.00) |

SD = Standard deviation; CCT = Central corneal thickness; IOP = Intraocular pressure; IQR = Interquartile range; SAP = Standard automated perimetry; MD = Mean deviation; PSD = Pattern standard deviation; VFI = Visual field index.

**Table S2.** Baseline demographic and clinical characteristics of eyes and subjects included in the optical coherence tomography sample.

| Characteristic                                                    | RACE                                     |                                          | ETHNICITY                                |                                          | TOTAL                                    |
|-------------------------------------------------------------------|------------------------------------------|------------------------------------------|------------------------------------------|------------------------------------------|------------------------------------------|
|                                                                   | Black or African American                | White                                    | Hispanic or Latino                       | Not Hispanic or Latino                   |                                          |
| <b>SUBJECT-SPECIFIC</b>                                           |                                          |                                          |                                          |                                          |                                          |
| Patients, n (%)                                                   | 416 (16.8%)                              | 2,063 (83.2%)                            | 584 (23.6%)                              | 1,895 (76.4%)                            | 2,479 (100.0%)                           |
| Age (years), mean $\pm$ SD                                        | 63.2 $\pm$ 10.8                          | 67.8 $\pm$ 11.1                          | 62.8 $\pm$ 11.5                          | 68.3 $\pm$ 10.7                          | 67.0 $\pm$ 11.2                          |
| Sex, n (%)<br>Female                                              | 270 (64.9%)                              | 1,265 (61.3%)                            | 395 (67.6%)                              | 1,140 (60.2%)                            | 1,535 (61.9%)                            |
| <b>EYE-SPECIFIC</b>                                               |                                          |                                          |                                          |                                          |                                          |
| Eyes, n (%)                                                       | 700 (17.0%)                              | 3,425 (83.0%)                            | 1,009 (24.5%)                            | 3,116 (75.5%)                            | 4,125 (100.0%)                           |
| CCT ( $\mu$ m), mean $\pm$ SD<br>median (IQR)                     | 525.8 $\pm$ 36.2<br>526.0 (501.0; 551.0) | 548.7 $\pm$ 39.0<br>548.0 (523.0; 573.0) | 544.5 $\pm$ 40.2<br>543.0 (520.0; 570.8) | 544.5 $\pm$ 39.2<br>544.0 (518.0; 570.0) | 544.5 $\pm$ 39.5<br>544.0 (519.0; 570.0) |
| Visits (n), mean $\pm$ SD (range)                                 | 15.9 $\pm$ 8.3<br>(1.0; 53.0)            | 15.6 $\pm$ 8.7<br>(1.0; 71.0)            | 14.7 $\pm$ 7.5<br>(1.0; 55.0)            | 16.0 $\pm$ 8.9<br>(1.0; 71.0)            | 15.7 $\pm$ 8.6<br>(1.0; 71.0)            |
| Mean IOP (mmHg), mean $\pm$ SD<br>median (IQR)                    | 15.3 $\pm$ 3.1<br>15.1 (13.0; 17.2)      | 15.3 $\pm$ 3.1<br>14.9 (13.1; 17.2)      | 15.5 $\pm$ 2.9<br>15.2 (13.5; 17.1)      | 15.2 $\pm$ 3.1<br>14.9 (13.0; 17.2)      | 15.3 $\pm$ 3.1<br>15.0 (13.1; 17.2)      |
| Peak IOP (mmHg), mean $\pm$ SD<br>median (IQR)                    | 20.1 $\pm$ 4.9<br>19.0 (17.0; 22.5)      | 19.6 $\pm$ 4.7<br>19.0 (16.0; 22.0)      | 19.9 $\pm$ 4.5<br>19.0 (17.0; 22.0)      | 19.6 $\pm$ 4.8<br>19.0 (16.0; 22.0)      | 19.7 $\pm$ 4.8<br>19.0 (16.0; 22.0)      |
| <b>Optical Coherence Tomography</b>                               |                                          |                                          |                                          |                                          |                                          |
| Follow-up (years), mean $\pm$ SD                                  | 7.1 $\pm$ 2.1                            | 6.9 $\pm$ 2.4                            | 6.9 $\pm$ 2.3                            | 7.0 $\pm$ 2.4                            | 7.0 $\pm$ 2.3                            |
| Tests (n), mean $\pm$ SD (range)                                  | 6.1 $\pm$ 1.3<br>(5.0; 13.0)             | 6.2 $\pm$ 1.4<br>(5.0; 14.0)             | 5.9 $\pm$ 1.1<br>(5.0; 11.0)             | 6.3 $\pm$ 1.5<br>(5.0; 14.0)             | 6.2 $\pm$ 1.4<br>(5.0; 14.0)             |
| Baseline RNFL thickness ( $\mu$ m), mean $\pm$ SD<br>median (IQR) | 83.0 $\pm$ 14.1<br>84.4 (74.0; 93.3)     | 81.5 $\pm$ 13.0<br>82.2 (72.9; 90.6)     | 84.5 $\pm$ 12.8<br>85.5 (76.0; 92.9)     | 80.9 $\pm$ 13.2<br>81.6 (72.0; 90.2)     | 81.7 $\pm$ 13.2<br>82.5 (73.1; 91.0)     |
| Exam quality (SS), mean $\pm$ SD<br>median (IQR)                  | 0.8 $\pm$ 0.1<br>0.8 (0.7; 0.9)          | 0.8 $\pm$ 0.1<br>0.8 (0.7; 0.9)          | 0.8 $\pm$ 0.1<br>0.8 (0.7; 0.9)          | 0.8 $\pm$ 0.1<br>0.8 (0.7; 0.9)          | 0.8 $\pm$ 0.1<br>0.8 (0.7; 0.9)          |

SD = Standard deviation; CCT = Central corneal thickness; IOP = Intraocular pressure; IQR = Interquartile range; OCT = Optical coherence tomography; RNFL = Retinal nerve fiber layer; SS = Signal strength.
